# Supplementary material
Source: Springer Nature journal article supplement (https://www.springermedizin.de/resource/supplementary/12875_2013_1172_MOESM3_ESM.docx/9436042)
Supplement: MOESM3 [file 9436042]

**Table 1. Sociodemographics of study population**

| **Population Characteristics (denominator)** | | **Percentage** |
| --- | --- | --- |
| **Gender (15856)** | Female  Male | 51.2% (8117)  48.8% (7739 |
| **Age Group (15856)** | 20-29  30-39  40-49  50-59  60-69  70-79  80-89  >89 | 0.1% (16)  1.1% (179)  9.2% (1462)  32.4% (5136)  29.4% (4663)  20.7% (3285)  6.8% (1078)  0.2% (37) |
| **Smoking status (15833)** | Never-smoked  Ever-smoked | 71.6% (11340)  28.4% (4493) |
| **Alcohol intake (15807)** | Non-drinker  Ever-drinker | 76.1% (12037)  23.9% (3370) |
| **Education level (15764)** | None  Primary  Secondary  Tertiary or above | 18.0% (2838)  40.2% (6338)  37.0% (5838)  4.8% (750) |
| **Occupation (11703)** | Housewife  Professional  Non-manual  Manual skilled  Manual non-skilled  Unemployed  Retired | 28.8% (3373)  1.9% (217)  10.6% (1238)  10.4% (1216)  8.8% (1033)  4.3% (503)  35.2% (4123) |
| **Body mass index (15807)** | <18.5  18.5-22.9  23-24.9  25-27.4  27.4-30  >30 | 1.2% (195)  22.3% (3526)  21.9% (3462)  26.3% (4162)  15.8% (2502)  12.4% (1960) |
| **Waist hip ratio (15789)**  Low (<0.8 female; <0.96 male)  Moderate (0.81-0.85 female; 0.96-1.0 male)  High (>0.85 female; >1.0 male) | | 25.8% (4070)  28.0% (4422)  46.2% (7297) |
| **Home monitoring* (15711)** | None  Urine testing only  Finger prick testing | 62.2% (9862)  1.1% (174)  36.3% (5756) |
| **Mean duration of diabetes** | | 7.3 years |
| **Comorbidities* (15856)** | Hypertension  Coronary heart disease  Stroke | 57.6% (9135)  3.8% (601)  4.5% (710) |
| *Percentages may not add up to 100% because of overlapping groups  Bracketed values after percentages indicate number of patients | | |

**Table 2. Lipid profile and eGFR among study population**

| **Clinical parameters** | | **1 SD** |
| --- | --- | --- |
| **Mean blood pressure**  Systolic  Diastolic | 138mmHg  76mmHg | (18.3)  (10.5) |
| **Mean lipid profile**  TC  LDL  HDL  TG  Total cholesterol*  <5.2  5.2-6.2  >6.2  LDL*  <2.6  2.6-3.3  3.4-4.1  4.1-4.9  >4.9  HDL*  <1.0  1.0-1.5  >1.5  TG*  <1.7  1.7-2.2  2.3-5.6  >5.6 | 5.0 mmol/L  3.1 mmol/L  1.2 mmol/L  1.6 mmol/L  60.9% (9650)  28.8% (4570)  9.9% (1577)  30.4% (4816)  35.9% (5699)  23.2% (3678)  7.4% (1169)  2.1% (329)  16.5% (4673)  53.6% (8505)  29.5% (4673)  68.1% (10797)  16.4% (2599)  14.1% (2235)  1.0% (165) | (0.9)  (0.8)  (0.3)  (1.1) |
| **Mean eGFR** (ml/min/1.73m2)  **Chronic kidney disease***  Stage 1  Stage 2  Stage 3  Stage 4  Stage 5 | 84.8  38.5% (6100)  48.8% (7736)  11.7% (1859)  0.3% (50)  0.1% (8) | (23.2) |
| **Mean urine ACR**  Proportion normal | 10.2 mg/mmol  67.7% (10434) | (42.7) |
| TC: total cholesterol; LDL: low density lipoprotein; HDL: high density lipoprotein; TG: triglyceride; ACR: albumin to creatinine ratio;  SD: standard deviation  Bracketed values after percentages indicate number of patients  *Percentages may not add up to 100% because of missing data | | |

**Table 3.** **Drug use among study population**

| **Type of Therapy** | **Proportion of Patients*** |
| --- | --- |
| **Diet alone** | 15.0% |
| **Glucose lowering therapy** |  |
| Metformin | 51.0% (8079) |
| Sulphonylurea | 42.0% (6651) |
| Glitazone | 0.5% (81) |
| Gliptin | 0.2% (34) |
| Insulin | 1.2% (183) |
| **Anti-hypertensives** |  |
| None | 50.3% (7948) |
| ACEI or ARB | 30.5% (4824) |
| β-blocker | 20.9% (3302) |
| CCB | 32.5% (5140) |
| Diuretic | 8.9% (1410) |
| **Lipid lowering therapy**  Statin  Fibrate | 20.7% (3273)  2.4% (378) |
| **Aspirin** | 8.2% (1296) |
| ACEI: angiotensin converting enzyme inhibitor  ARB: angiotensin receptor blocker  CCB: calcium channel blocker  * Percentages do not add up to 100% because some patients may be taking more than one therapy | |

**Table 4. Prevalence of diabetic complications**

| **Complication*** | **Percentage** |
| --- | --- |
| **Diabetic retinopathy (n = 1920)**  Mild non-proliferative  Moderate to severe non-proliferative  Proliferative | 12.1% (1711)  0.5% (76)  0.3% (48) |
| **Nephropathy (n = 5986)**  Incipient  Overt | 30.9% (4765)  7.9% (1221) |
| **Neuropathy (by monofilament/tuning fork) (n = 386)**  Reported numbness  Presence of foot ulcer  Absent foot pulses  Foot deformity  Presence of callosity  Presence of suspected skin infection  Nail abnormalities | 2.4% (386)  5.4% (860)  0.5% (83)  0.2% (38)  4.3% (678)  30.3% (4801)  2.2% (348)  7.3% (1158) |
| **Erectile dysfunction (male only)** | 15.0% (1102) |
| *Missing data is excluded from analysis | |
